**S8 Fig. Adjusted hazard ratios for major occlusive vascular disease by screen-detected diabetes status**

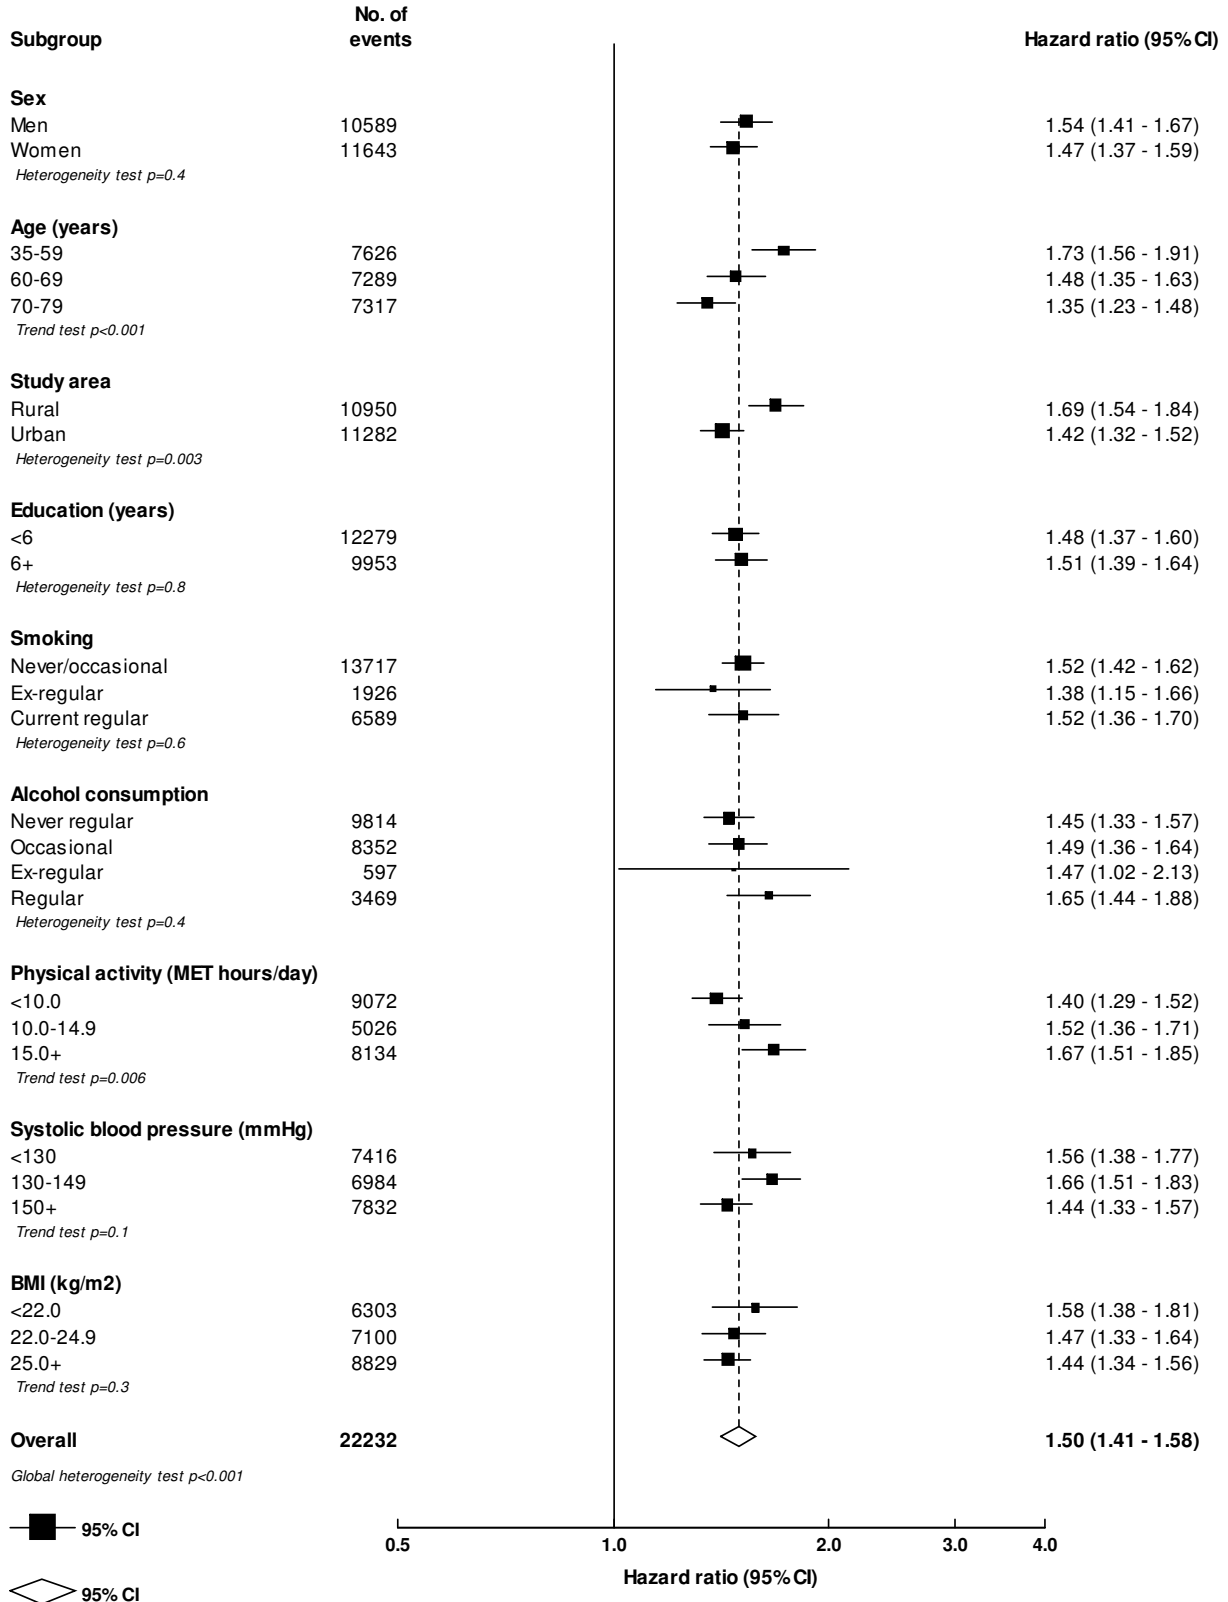

Source: https://storage.googleapis.com/plos-corpus-prod/10.1371/journal.pmed.1002026/1/pmed.1002026.s008.pdf
