# Supplementary material for: Risks and Population Burden of Cardiovascular Diseases Associated with Diabetes in China: A Prospective Study of 0.5 Million Adults
Source: PLOS journal article supplement (doi:10.1371/journal.pmed.1002026), 2016-07-05
Supplement: S10 (10.1371/journal.pmed.1002026.s010) [file journal.pmed.1002026.s010]

**S2 Table. Adjusted hazard ratios for incident cardiovascular diseases by self-reported diabetes status excluding participants who developed incident diabetes during follow-up (n= 8896)**

| Outcomes                                  | HR <sup>a</sup> | 95% CI    |
|-------------------------------------------|-----------------|-----------|
| <b>Self-reported diabetes<sup>b</sup></b> |                 |           |
| Cardiovascular disease mortality          | 2.05            | 1.88-2.24 |
| Major occlusive vascular disease          | 1.82            | 1.74-1.91 |
| Ischaemic heart disease                   |                 |           |
| Fatal MI                                  | 2.63            | 2.18-3.18 |
| Non-fatal MI                              | 2.31            | 1.90-2.80 |
| Major coronary event                      | 2.47            | 2.20-2.76 |
| <b>Stroke</b>                             |                 |           |
| <i>Ischaemic stroke</i>                   |                 |           |
| Fatal                                     | 2.19            | 1.58-3.04 |
| Non-fatal                                 | 1.72            | 1.63-1.82 |
| Any                                       | 1.73            | 1.64-1.82 |
| <i>Intracerebral haemorrhage</i>          |                 |           |
| Fatal                                     | 1.58            | 1.29-1.94 |
| Non-fatal                                 | 1.00            | 0.81-1.24 |
| Any                                       | 1.24            | 1.07-1.44 |
| <i>Total stroke</i>                       |                 |           |
| Fatal                                     | 1.76            | 1.50-2.07 |
| Non-fatal                                 | 1.64            | 1.56-1.73 |
| Any                                       | 1.65            | 1.57-1.73 |

<sup>a</sup>Stratified by age, sex and study area and adjusted for education, smoking, alcohol, physical activity and systolic blood pressure; <sup>b</sup>Reference group is individuals without self-reported or screen-detected diabetes.

Events classified as fatal if death from any cause within 28 days.

CI, confidence interval; HR, hazard ratio; MI, myocardial infarction.
